# Supplementary material
Source: Research Square preprint supplement (doi:10.21203/rs.3.rs-9664465/v1)
Supplement: Supplementary file 1 [file 3809926b8fb80d7394fcb0c2.pdf]

## Balancing Affinity and Chelator Density: Random Versus Site-Specific Single-Domain Antibody Radiolabelling for PET imaging of B7-H3 expressing tumors.

Cyprine Neba Funeh<sup>1\*</sup>, Sofie Godfried Declercq<sup>1</sup>, Jessica Bridoux<sup>1</sup>, Wei Min Chen<sup>2</sup>, Abbas El Sahili<sup>2</sup>, Julien Lescar<sup>2</sup>, Matthias D'Huyvetter<sup>1#</sup>, Nick Devoogdt<sup>1#\*</sup>.

### Supplementary sheet.

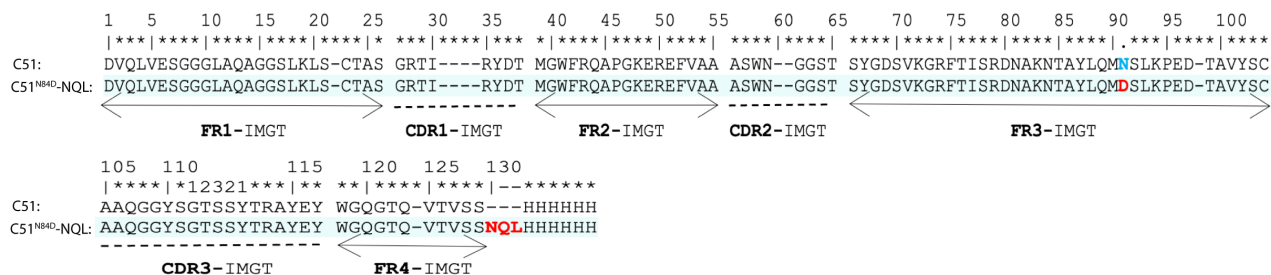

**Fig. S1** Pairwise amino acid sequence alignment of native C51 and mutated C51<sup>N84D</sup>-NQL sdAbs. Framework and CDR regions are highlighted (arrows and dotted lines, respectively), as well as the mutated amino acid in position 84 (91-IMGT numbering) and the inserted -NQL tag. C51, native C51 sdAb; C51<sup>N84D</sup>-NQL, modified C51 sdAb containing VyPAL2-recognition-tag and a mutation.

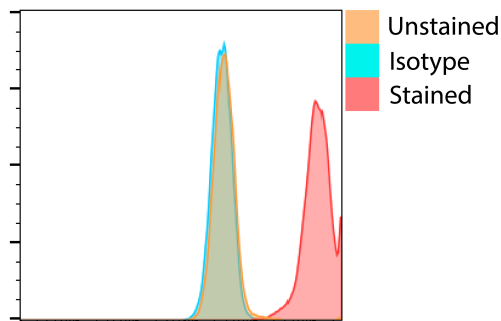

**Fig. S2** Flow cytometry confirming native B7-H3 expression on U87-MG cells

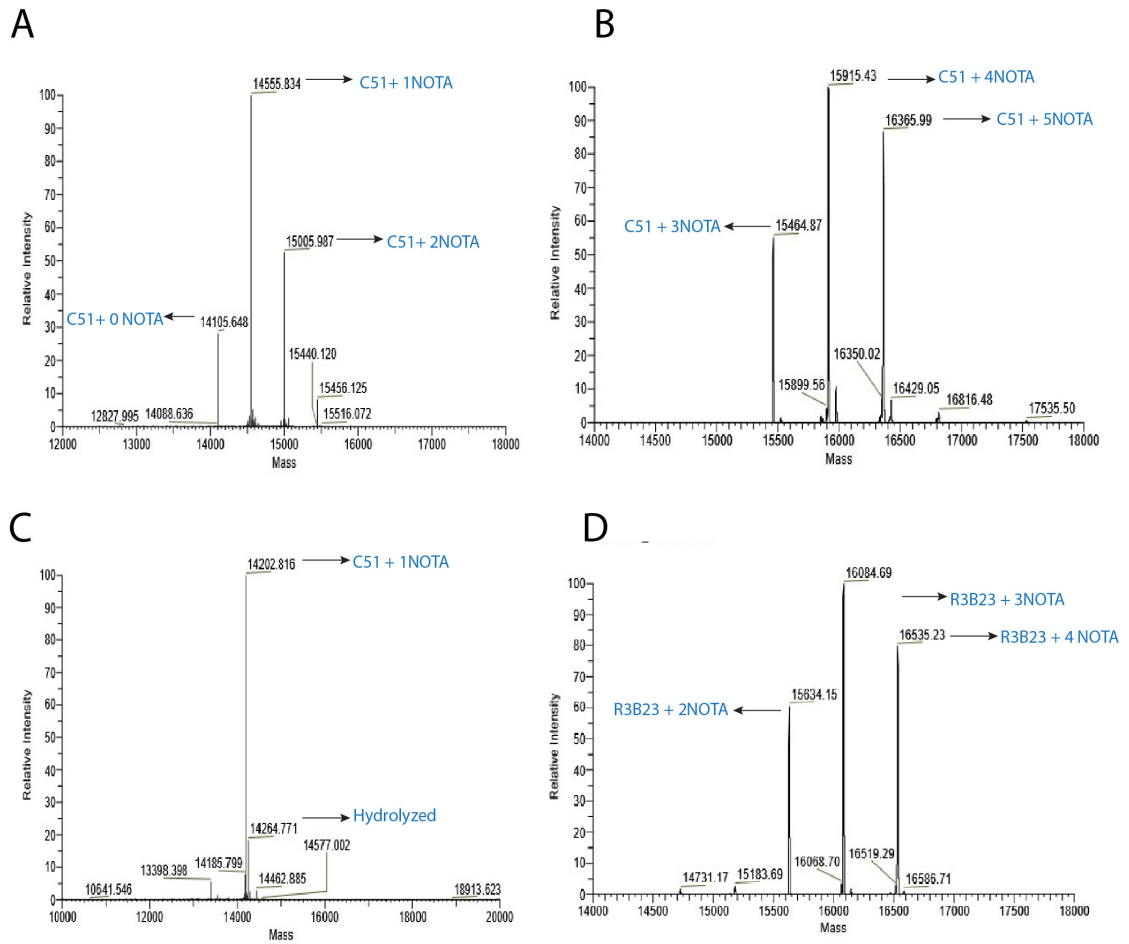

**Fig. S3** Mass spectrometry profiles detailing different Chelator to sdAb ratios (CAR). (A) Randomly conjugated C51 construct with a ratio of 1.08 (CAR<sub>L</sub>), (B) Randomly conjugated C51 with a ratio of 3.8 (CAR<sub>H</sub>), (C) VyPAL2 mediated site-specific conjugated C51(C51-NGIGK-NOTA) with CAR of 0.96, and (D) R3B23-NOTA (CAR: 3.0)

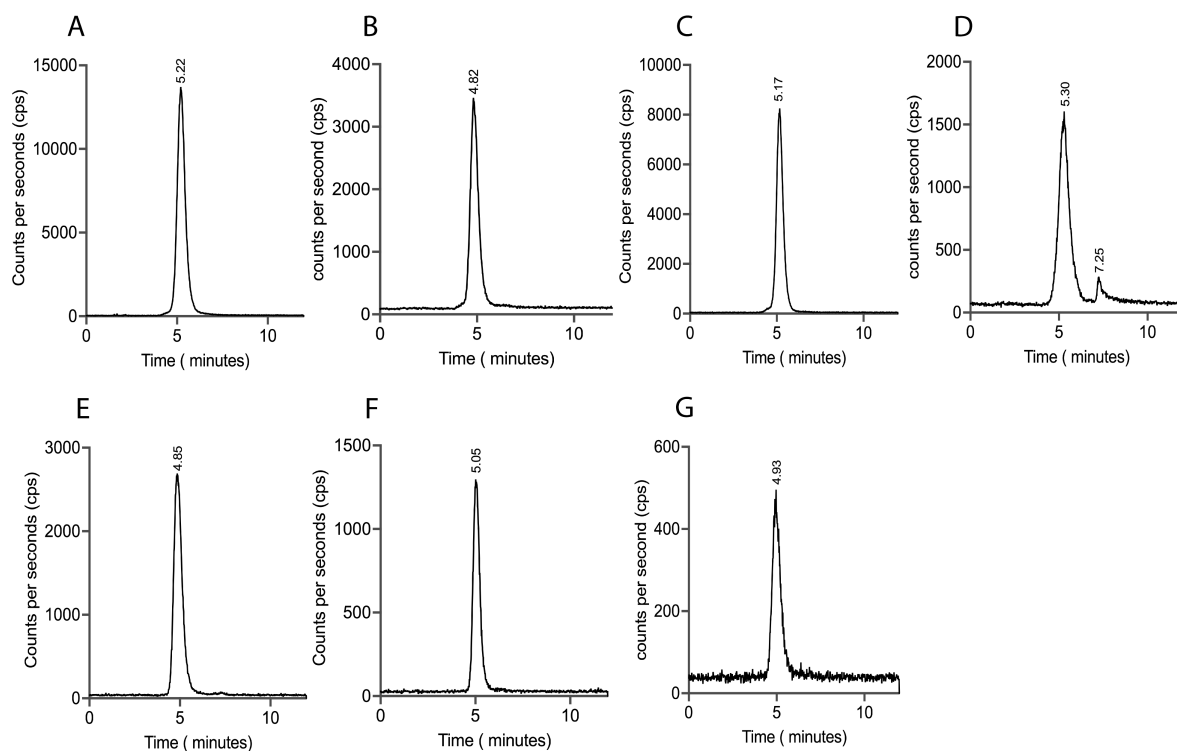

**Fig S4** Radio size exclusion chromatograms of  $^{68}\text{Ga}$  and  $^{64}\text{Cu}$  radiolabeled tracers. (A) [ $^{68}\text{Ga}$ ]Ga-NOTA-C51\_CAR<sub>L</sub>, (B) [ $^{68}\text{Ga}$ ]Ga-NOTA-C51\_CAR<sub>H</sub>, (C) [ $^{68}\text{Ga}$ ]Ga-NOTA-NGIGK-C51, (D) [ $^{68}\text{Ga}$ ]Ga-NOTA-R3B23, free  $^{68}\text{Ga}$  at 7.25', (E) [ $^{64}\text{Cu}$ ]Cu-NOTA-C51, (F) [ $^{64}\text{Cu}$ ]Cu-NOTA-NGIGK-C51, (G) [ $^{64}\text{Cu}$ ]Cu-NOTA-R3B23.

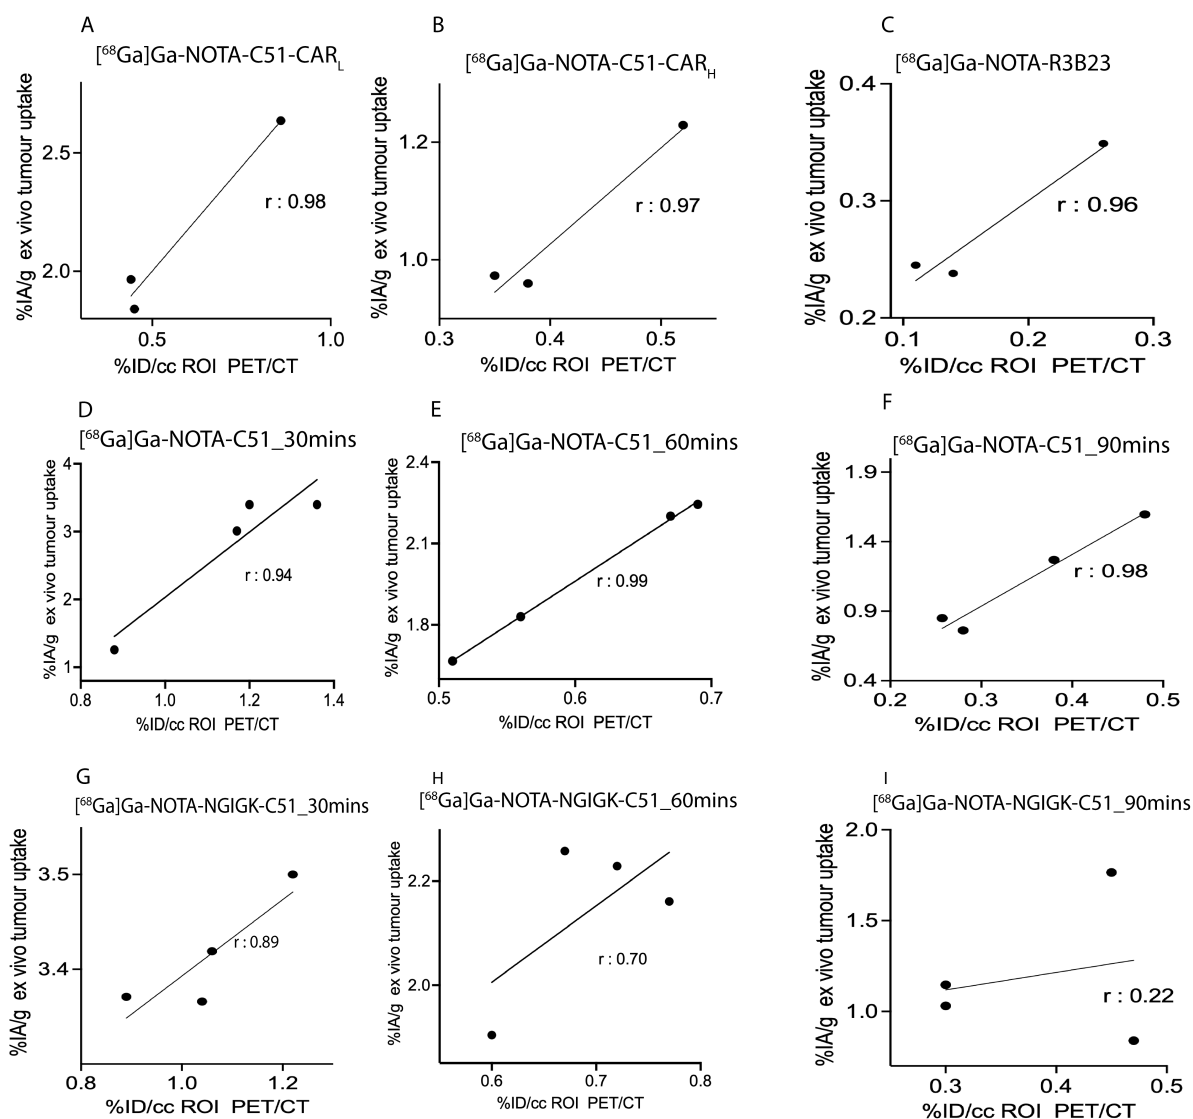

**Fig. S5** Correlation plots of tumor radioactivity uptake measured via PET image quantification by drawing a region of interest (ROI) versus ex vivo measured radioactive uptake. (A-C)  $[^{68}\text{Ga}]\text{Ga-NOTA-C51-CAR}_L$ ,  $[^{68}\text{Ga}]\text{Ga-NOTA-C51-CAR}_H$ , and  $[^{68}\text{Ga}]\text{Ga-NOTA-R3B23}$ ,  $n = 3$ , (D-F)  $[^{68}\text{Ga}]\text{Ga-NOTA-C51}$  at 30mins, 60 mins, and 90 mins p.i.,  $n = 4$ , (G-I)  $[^{68}\text{Ga}]\text{Ga-NOTA-NGIGK-C51}$  at 30 mins, 60 mins, and 90 mins p.i.,  $n = 4$ .

**Table S1** Radiochemical characteristics of  $^{68}\text{Ga}$ - and  $^{64}\text{Cu}$  radiotracers. Radiochemical purities (RCPs) were determined by radio size exclusion chromatography (Radio SE HPLC). Radiochemical yield (RCY) was calculated by measuring the activity of the end product and expressing it as a percentage of the starting activity, decay corrected. The specific activity was calculated by dividing the activity of the product by the recovered mass of sdAb in the product after purification.

| Radiotracer                                  | Decay corrected radiochemical yield (%) | Specific activity (MBq/ $\mu\text{g}$ ) | RCP before purification (%) | RCP After purification (%) |
|----------------------------------------------|-----------------------------------------|-----------------------------------------|-----------------------------|----------------------------|
| $[^{68}\text{Ga}]\text{Ga-NOTA-C51 (CAR}_L)$ | $74.4 \pm 6.1$ ( $n=5$ )                | $4.9 \pm 1.8$ ( $n=5$ )                 | $96.4 \pm 0.6$ ( $n=5$ )    | $98.7 \pm 1.0$ ( $n=5$ )   |
| $[^{68}\text{Ga}]\text{Ga-NOTA-C51 (CAR}_H)$ | $70.0 \pm 5.1$ ( $n=2$ )                | $4.3 \pm 2.8$ ( $n=2$ )                 | $96.5 \pm 0$ ( $n=1$ )      | $100 \pm 00$ ( $n=1$ )     |
| $[^{68}\text{Ga}]\text{Ga-NOTA-KGIGN-C51}$   | $78.2 \pm 5.1$ ( $n=6$ )                | $5.0 \pm 0.9$ ( $n=6$ )                 | $93.7 \pm 0.9$ ( $n=4$ )    | $97.9 \pm 1.5$ ( $n=4$ )   |

|                                                    |                   |                 |                  |                  |
|----------------------------------------------------|-------------------|-----------------|------------------|------------------|
| [ <sup>68</sup> Ga]Ga-NOTA-R3B23                   | 70.0 ± 10.5 (n=3) | 6.2 ± 0.7 (n=2) | 94.7 ± 6.0 (n=2) | 95.8 ± 5.8 (n=2) |
| [ <sup>64</sup> Cu]Cu-NOTA-C51 (CAR <sub>L</sub> ) | 83.6 ± 5.5 (n=2)  | 2.4 ± 1.3 (n=2) | 99.8 ± 0.4 (n=2) | 99.6 ± 0.1 (n=2) |
| [ <sup>64</sup> Cu]Cu-NOTA-KGIGN-C51               | 87.2 ± 0.3 (n=2)  | 2.6 ± 1.3 (n=2) | 98.7 ± 1.1 (n=2) | 99.5 ± 0.1 (n=2) |
| [ <sup>64</sup> Cu]Cu-NOTA-R3B23                   | 88.8 ± 0.0 (n=1)  | 1.6 ± 0.0 (n=1) | 97.4 ± 0.0 (n=1) | 98.9 ± 0.0 (n=1) |

**Table S2** Ex vivo biodistribution results of [<sup>68</sup>Ga]Ga-NOTA-C51 tracers in U87-MG tumor model (n=5) at 80 minutes post injection (p.i.). All results are represented as mean ± SD of injected activity per gram (%IA/g).

| Organ/Tissue    | [ <sup>68</sup> Ga]Ga-NOTA-C51_CAR <sub>L</sub> (%IA/g) | [ <sup>68</sup> Ga]Ga-NOTA-C51_CAR <sub>H</sub> (%IA/g) | [ <sup>68</sup> Ga]Ga-NOTA-R3B23 (%IA/g) |
|-----------------|---------------------------------------------------------|---------------------------------------------------------|------------------------------------------|
| Blood           | 0.22 ± 0.05                                             | 0.25 ± 0.03                                             | 0.24 ± 0.06                              |
| Lymph nodes     | 0.20 ± 0.09                                             | 0.19 ± 0.03                                             | 0.11 ± 0.08                              |
| Heart           | 0.12 ± 0.02                                             | 0.16 ± 0.03                                             | 0.16 ± 0.03                              |
| Lung            | 0.32 ± 0.03                                             | 0.47 ± 0.10                                             | 0.32 ± 0.09                              |
| Liver           | 0.31 ± 0.07                                             | 0.63 ± 0.09                                             | 0.53 ± 0.09                              |
| Pancreas        | 0.09 ± 0.01                                             | 0.16 ± 0.02                                             | 0.16 ± 0.03                              |
| Spleen          | 0.12 ± 0.01                                             | 0.18 ± 0.02                                             | 0.19 ± 0.05                              |
| R Kidneys       | 185.27 ± 20.17                                          | 117.07 ± 20.54                                          | 75.82 ± 10.48                            |
| Stomach         | 0.16 ± 0.02                                             | 0.21 ± 0.01                                             | 0.19 ± 0.04                              |
| Small intestine | 0.13 ± 0.02                                             | 0.18 ± 0.03                                             | 0.16 ± 0.02                              |
| Large intestine | 0.18 ± 0.02                                             | 0.21 ± 0.04                                             | 0.21 ± 0.07                              |
| Ovary           | 0.25 ± 0.03                                             | 0.23 ± 0.10                                             | 0.23 ± 0.08                              |
| Uterus          | 0.39 ± 0.10                                             | 0.38 ± 0.10                                             | 0.32 ± 0.05                              |
| Skin            | 0.28 ± 0.03                                             | 0.34 ± 0.04                                             | 0.36 ± 0.06                              |
| Muscle          | 0.10 ± 0.04                                             | 0.10 ± 0.04                                             | 0.10 ± 0.06                              |
| Bone            | 0.11 ± 0.06                                             | 0.12 ± 0.06                                             | 0.10 ± 0.02                              |
| Brain           | 0.02 ± 0.01                                             | 0.02 ± 0.00                                             | 0.01 ± 0.00                              |
| Tumor           | 2.20 ± 0.31                                             | 1.30 ± 0.50                                             | 0.28 ± 0.05                              |

**Table S3** Ex vivo biodistribution over time for <sup>68</sup>Ga-labelled tracers (random Vs site-specific) in a U87-MG tumor model (n = 6) at 50, 80, and 110 minutes p.i. All results are represented as mean ± SD of injected activity per gram (%IA/g).

| ORGAN / TISSUE | 50 minutes                             |                                              | 80 minutes                             |                                              | 110 minutes                            |                                              |
|----------------|----------------------------------------|----------------------------------------------|----------------------------------------|----------------------------------------------|----------------------------------------|----------------------------------------------|
|                | [ <sup>68</sup> Ga]Ga-NOTA-C51 (%IA/g) | [ <sup>68</sup> Ga]Ga-NOTA-NGIGK-C51 (%IA/g) | [ <sup>68</sup> Ga]Ga-NOTA-C51 (%IA/g) | [ <sup>68</sup> Ga]Ga-NOTA-NGIGK-C51 (%IA/g) | [ <sup>68</sup> Ga]Ga-NOTA-C51 (%IA/g) | [ <sup>68</sup> Ga]Ga-NOTA-NGIGK-C51 (%IA/g) |
| Blood          | 1.01 ± 0.25                            | 0.89 ± 0.24                                  | 0.30 ± 0.07                            | 0.27 ± 0.16                                  | 0.14 ± 0.02                            | 0.22 ± 0.03                                  |
| L.nodes        | 0.48 ± 0.28                            | 0.57 ± 0.21                                  | 0.17 ± 0.06                            | 0.15 ± 0.09                                  | 0.10 ± 0.06                            | 0.13 ± 0.04                                  |
| Heart          | 0.42 ± 0.11                            | 0.34 ± 0.11                                  | 0.14 ± 0.04                            | 0.14 ± 0.03                                  | 0.08 ± 0.01                            | 0.10 ± 0.02                                  |
| Lung           | 0.87 ± 0.12                            | 0.72 ± 0.17                                  | 0.41 ± 0.12                            | 0.36 ± 0.14                                  | 0.22 ± 0.05                            | 0.24 ± 0.04                                  |
| Liver          | 0.51 ± 0.09                            | 0.70 ± 0.08                                  | 0.34 ± 0.06                            | 0.61 ± 0.14                                  | 0.33 ± 0.04                            | 1.04 ± 0.23                                  |
| Pancreas       | 0.29 ± 0.06                            | 0.26 ± 0.07                                  | 0.12 ± 0.02                            | 0.16 ± 0.07                                  | 0.07 ± 0.01                            | 0.09 ± 0.02                                  |
| Spleen         | 0.29 ± 0.03                            | 0.32 ± 0.07                                  | 0.16 ± 0.03                            | 0.33 ± 0.17                                  | 0.14 ± 0.03                            | 0.42 ± 0.15                                  |

|             |                  |                   |                |                |               |                |
|-------------|------------------|-------------------|----------------|----------------|---------------|----------------|
| L kidney    | 159.27<br>±13.28 | 130.23 ±<br>14.65 | 150.61 ± 17.59 | 147.05 ± 46.93 | 149.22 ± 6.25 | 136.36 ± 16.94 |
| Stomach     | 0.58 ± 0.11      | 0.42 ± 0.06       | 0.21 ± 0.04    | 0.18 ± 0.05    | 0.10 ± 0.02   | 0.12 ± 0.02    |
| S.intestine | 0.35 ± 0.10      | 0.26 ± 0.06       | 0.22 ± 0.10    | 0.19 ± 0.14    | 0.10 ± 0.02   | 0.10 ± 0.02    |
| L.intestine | 0.37 ± 0.13      | 0.28 ± 0.08       | 0.22 ± 0.10    | 0.30 ± 0.22    | 0.11 ± 0.03   | 0.13 ± 0.04    |
| Ovary       | 0.47 ± 0.17      | 0.31 ± 0.14       | 0.20 ± 0.11    | 0.19 ± 0.07    | 0.12 ± 0.07   | 0.12 ± 0.05    |
| Uterus      | 1.17 ± 0.32      | 0.98 ± 0.32       | 0.42 ± 0.06    | 0.43 ± 0.23    | 0.18 ± 0.05   | 0.20 ± 0.04    |
| Skin        | 1.28 ± 0.33      | 0.94 ± 0.16       | 0.40 ± 0.04    | 0.69 ± 0.51    | 0.20 ± 0.03   | 0.24 ± 0.06    |
| Muscle      | 0.33 ± 0.08      | 0.27 ± 0.08       | 0.10 ± 0.01    | 0.10 ± 0.04    | 0.05 ± 0.01   | 0.07 ± 0.03    |
| Bone        | 0.29 ± 0.08      | 0.42 ± 0.27       | 0.13 ± 0.04    | 0.11 ± 0.04    | 0.08 ± 0.01   | 0.11 ± 0.02    |
| Brain       | 0.04 ± 0.01      | 0.04 ± 0.01       | 0.02 ± 0.00    | 0.01 ± 0.00    | 0.01 ± 0.00   | 0.01 ± 0.00    |
| Tumor       | 3.25 ± 1.14      | 3.67 ± 0.58       | 2.05 ± 0.22    | 1.99 ± 0.48    | 1.18 ± 0.32   | 1.17 ± 0.32    |

**Table S4** Ex vivo biodistribution for <sup>64</sup>Cu-labelled tracers (random Vs site-specific ) in a U87-MG tumor model (n=3) at 80 minutes p.i. All results are represented as mean ± SD of injected activity per gram (%IA/g).

| Organ/tissue | [ <sup>64</sup> Cu]Cu-NOTA-C51<br>(%IA/g) | [ <sup>64</sup> Cu]Cu-NOTA-NGIGK-<br>C51 (%IA/g) | [ <sup>64</sup> Cu]Cu-NOTA-R3B23<br>(%IA/g) |
|--------------|-------------------------------------------|--------------------------------------------------|---------------------------------------------|
| Blood        | 0.24 ± 0.11                               | 0.26 ± 0.06                                      | 0.11 ± 0.00                                 |
| L. nodes     | 0.40 ± 0.15                               | 0.47 ± 0.15                                      | 0.17 ± 0.09                                 |
| Heart        | 0.22 ± 0.08                               | 0.16 ± 0.02                                      | 0.12 ± 0.01                                 |
| Lung         | 0.44 ± 0.19                               | 0.44 ± 0.08                                      | 0.20 ± 0.05                                 |
| Liver        | 0.95 ± 0.23                               | 0.36 ± 0.02                                      | 0.49 ± 0.06                                 |
| Pancreas     | 0.18 ± 0.04                               | 0.13 ± 0.03                                      | 0.11 ± 0.00                                 |
| Spleen       | 0.24 ± 0.05                               | 0.13 ± 0.03                                      | 0.11 ± 0.01                                 |
| L kidney     | 177.77 ± 30.76                            | 195.97 ± 18.27                                   | 75.79 ± 8.26                                |
| Stomach      | 0.30 ± 0.06                               | 0.21 ± 0.03                                      | 0.15 ± 0.02                                 |
| S. intestine | 0.32 ± 0.07                               | 0.20 ± 0.01                                      | 0.17 ± 0.01                                 |
| L. intestine | 0.38 ± 0.13                               | 0.23 ± 0.06                                      | 0.20 ± 0.04                                 |
| Ovary        | 0.46 ± 0.09                               | 0.33 ± 0.12                                      | 0.17 ± 0.03                                 |
| Uterus       | 0.36 ± 0.07                               | 0.59 ± 0.11                                      | 0.22 ± 0.06                                 |
| Skin         | 0.37 ± 0.05                               | 0.47 ± 0.06                                      | 0.29 ± 0.04                                 |
| Muscle       | 0.10 ± 0.01                               | 0.13 ± 0.02                                      | 0.05 ± 0.00                                 |
| Bone         | 0.16 ± 0.01                               | 0.16 ± 0.02                                      | 0.09 ± 0.02                                 |
| Brain        | 0.02 ± 0.00                               | 0.02 ± 0.00                                      | 0.01 ± 0.00                                 |
| Tumor        | 1.27 ± 0.40                               | 1.89 ± 0.44                                      | 0.26 ± 0.09                                 |
